# Supplementary material
Source: PubMed Central journal article supplement (PMC8238401)
Supplement: mmc2.pdf [file mmc2.pdf]

# 3CLpro and PLpro affinity, a docking study to fight COVID19 based on 900 compounds from PubChem and literature. Are there new drugs to be found?

Marek Štekláč,<sup>1</sup> Dávid Zajaček<sup>1</sup> and Lukáš Bučinský<sup>1</sup>

Correspondence to: Marek Štekláč (E-mail: [xsteklacm@stuba.sk](mailto:xsteklacm@stuba.sk))

<sup>1</sup> *Institute of Physical Chemistry and Chemical Physics, Faculty of Chemical and Food Technology, Slovak Technical University, SK-81237, Bratislava, Slovakia*

## TABLE OF CONTENTS

|                                                                                                                                                               |    |
|---------------------------------------------------------------------------------------------------------------------------------------------------------------|----|
| Commonly used identifiers, obtained docking scores, the pharmacological functions and structures of ten best scoring compounds against each protein: Table S1 | 2  |
| Putative docking poses of five best scoring compounds against each protein: Tables S2A-S2C                                                                    | 4  |
| Time plot evolutions of the number of H-bonds during molecular dynamics (MD) simulations: Figures S1A-S1B                                                     | 8  |
| H-bonds identifications and occupancies during MD simulations: Tables S3A-S3E and S4A-S4E                                                                     | 9  |
| Time plot evolutions of values of binding free energies during MD simulations: Figures S2A-S2B                                                                | 12 |
| Docking pose of Suramine in 6WZU PLpro structure: Figure S3                                                                                                   | 14 |
| Ligand efficacies of studied compounds against targeted proteases: Figures S4A-S4D                                                                            | 15 |
| References                                                                                                                                                    | 16 |

**Table S1.** CID identifiers, trivial names (in brackets), docking scores in kcal/mol, recognized pharmacological functions and molecular structures[1] of ten compounds downloaded PubChem database [2,3] with highest binding affinities towards 3CL<sup>pro</sup>/PL<sup>pro</sup> structures.

| No | 6WQF (3CL <sup>pro</sup> )                                                                                                                                                                                       | 6LU7 (3CL <sup>pro</sup> )                                                                                                                                               | 6WZU (PL <sup>pro</sup> )                                                                                                                                                             | 7CMD (PL <sup>pro</sup> )                                                                                                                                                |
|----|------------------------------------------------------------------------------------------------------------------------------------------------------------------------------------------------------------------|--------------------------------------------------------------------------------------------------------------------------------------------------------------------------|---------------------------------------------------------------------------------------------------------------------------------------------------------------------------------------|--------------------------------------------------------------------------------------------------------------------------------------------------------------------------|
| 1  | 5281040 (Montelukast)<br>-14.75<br>Anti-inflammatory and bronchodilating activity<br>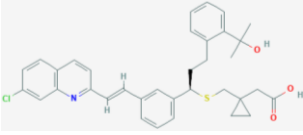                                           | 3191 (Ebastine)<br>-14.11<br>Anti-inflammatory activity<br>                             | 16923 (Solumedrol)<br>-10.89<br>Anti-inflammatory and immunosuppressive activity<br>                | 121893 (Protoporphyrinogen IX)<br>-11.58<br>-<br>                                     |
| 2  | 53472683 (Vazegepant/zavegepant)<br>-14.57<br>Anti-migraine activity<br>                                                        | 53472683 (Vazegepant/zavegepant)<br>-13.80<br>Anti-migraine activity<br>                | 73425380 (TAK-599)<br>-10.69<br>Anti-MRSA activity<br>                                              | 9548902 (Taurochenode oxycholate(1-))<br>-11.24<br>Human metabolite<br>               |
| 3  | 6918155 (Ciclesonide)<br>-14.39<br>Anti-inflammatory and antiviral activity<br>                                               | 154573806 (GRL-024-20)<br>-13.58<br>- [a]<br>                                         | 25245769 (Biliverdine(2-))<br>-10.67<br>Human metabolite<br>                                      | 60947 (Tirofiban)<br>-10.97<br>Anti-coagulant activity<br>                          |
| 4  | 5459840 (20-Hydroxyecdysone)<br>-14.07<br>Protective role in the cardiovascular system and performance enhancing activity<br> | 5281040 (Montelukast)<br>-12.83<br>Anti-inflammatory and bronchodilating activity<br> | 135483998 (5-Methyltetrahydrofolate)<br>-10.66<br>Anti-neoplastic and antidepressant activity<br> | 5362119 (Lisinopril)<br>-10.90<br>ACE inhibitor with anti-hypertensive activity<br> |
| 5  | 154573806 (GRL-024-20)<br>-14.05<br>- [a]<br>                                                                                 | 46700782 (Razuprotafib)<br>-12.83<br>Potential vasculature stabilizing activity<br>   | 122146 (-[b])<br>-10.61<br>- [a]<br>                                                              | 72734520 (Avitinib)<br>-10.77<br>Tyrosine kinase inhibitor<br>                      |

|    |                                                                                                                                                                                                                       |                                                                                                                                                                                                 |                                                                                                                                                                                                                  |                                                                                                                                                                                         |
|----|-----------------------------------------------------------------------------------------------------------------------------------------------------------------------------------------------------------------------|-------------------------------------------------------------------------------------------------------------------------------------------------------------------------------------------------|------------------------------------------------------------------------------------------------------------------------------------------------------------------------------------------------------------------|-----------------------------------------------------------------------------------------------------------------------------------------------------------------------------------------|
| 6  | <p>46700782 (Razuprotafib)<br/>-13.86<br/>Potential vasculature stabilizing activity</p> 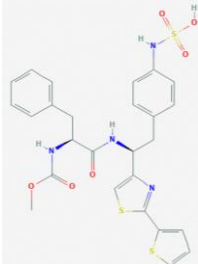                                            | <p>71481120 (GC-376)<br/>-12.79<br/>Broad-spectrum antiviral drug in development</p>                           | <p>135398658 (Folic acid)<br/>-10.58<br/>Essential for hematopoiesis and red blood cell production</p>                         | <p>10074640 (Masitinib)<br/>-10.75<br/>Tyrosine kinase inhibitor</p>                                 |
| 7  | <p>5283731 (Calcifediol)<br/>-13.78<br/>Vitamin D supplementation with potential immunomodulating activity</p>                       | <p>92722 (Argatroban)<br/>-12.76<br/>Anti-thrombotic activity</p>                                              | <p>16623 (-<sup>[b]</sup>) (Hydrocortisone hemisuccinate)<br/>-10.41<br/>Anti-inflammatory and immunosuppressive activity</p>  | <p>5497105 (Geranylgeranyl diphosphate)<br/>-10.71<br/>Human metabolite</p>                          |
| 8  | <p>5280453 (Calcitriol)<br/>-13.63<br/>Synthetic analogue of vitamin D able to inhibit proliferation of some tumor cell types</p>  | <p>71316139 (-<sup>[b]</sup>)<br/>-12.66<br/>.<sup>[a]</sup></p>                                             | <p>46783527 (Taurocholic acid)<br/>-10.40<br/>Human metabolite</p>                                                           | <p>60846 (Valsartan)<br/>-10.67<br/>Angiotensin II antagonist with anti-hypertensive activity</p>  |
| 9  | <p>6918602 (Relacatib)<br/>-13.49<br/>Inhibitor of cathepsin K</p>                                                                 | <p>122146 (-<sup>[b]</sup>)<br/>-12.57<br/>.<sup>[a]</sup></p>                                               | <p>9548902 (Taurochenodeoxycholate(1-))<br/>-10.37<br/>Human metabolite</p>                                                  | <p>73425380 (TAK-599)<br/>-10.56<br/>Anti-MRSA activity</p>                                        |
| 10 | <p>145343771 (Peptidomimetic aldehyde 11a)<br/>-13.48<br/>Inhibitor of SARS coronavirus main proteinase</p>                        | <p>145343771 (Peptidomimetic aldehyde 11a)<br/>-12.50<br/>Inhibitor of SARS coronavirus main proteinase</p>  | <p>53472683 (Vazegepant/zavegepant)<br/>-10.21<br/>Anti-migraine activity</p>                                                | <p>9810132 (-<sup>[b]</sup>)<br/>-10.55<br/>.<sup>[a]</sup></p>                                    |

<sup>a)</sup> No pharmacological functions have been reported

<sup>b)</sup> Compound does not have a trivial name

**Table S2A.** CID, trivial name, docking score (in brackets), putative binding sites and description of predicted H-bonds of five best scoring compounds against 6WQF structure of 3CL<sup>PRO</sup>[4]. Docked compounds are in purple colour and the protein is in green.

**5281040 – Montelukast (-14.75 kcal/mol)**

His163(NE<sub>2</sub>) ... O<sub>1</sub>,  $d = 2.196 \text{ \AA}$   
 H(O<sub>3</sub>) ... Arg188,  $d = 1.745 \text{ \AA}$   
 Thr190(N)...O<sub>3</sub>,  $d = 1.918 \text{ \AA}$

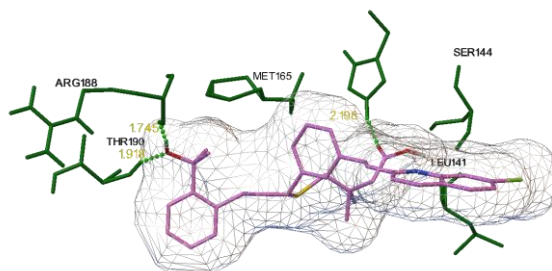

**53472683 – Vazegepant (-14.57 kcal/mol)**

Thr26(N) ... O<sub>2</sub>,  $d = 1.818 \text{ \AA}$   
 Asn142(ND<sub>2</sub>) ... O<sub>3</sub>,  $d = 2.108 \text{ \AA}$   
 Gly143(N) ... O<sub>1</sub>,  $d = 1.766 \text{ \AA}$

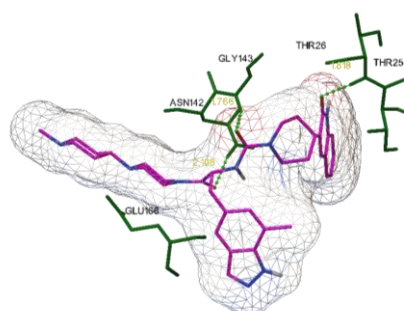

**6918155 – Ciclesonide (-14.39 kcal/mol)**

Thr26(N) ... O<sub>3</sub>,  $d = 2.246 \text{ \AA}$   
 Gln189(NE<sub>2</sub>) ... O<sub>4</sub>,  $d = 1.803 \text{ \AA}$

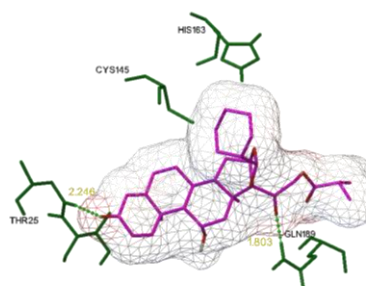

**5459840 – 20-hydroxyecdysone (-14.07 kcal/mol)**

Thr26(N) ... O<sub>7</sub>,  $d = 1.877 \text{ \AA}$   
 Gly143(N) ... O<sub>1</sub>,  $d = 1.980 \text{ \AA}$   
 Glu166(N) ... O<sub>2</sub>,  $d = 1.756 \text{ \AA}$   
 H(O<sub>2</sub>) ... Gu166(O),  $d = 2.097 \text{ \AA}$   
 Thr190(N) ... O<sub>4</sub>,  $d = 1.745 \text{ \AA}$   
 H(O<sub>4</sub>) ... Thr190(O),  $d = 1.812 \text{ \AA}$   
 Gln192(NE) ... O<sub>4</sub>,  $d = 2.216 \text{ \AA}$

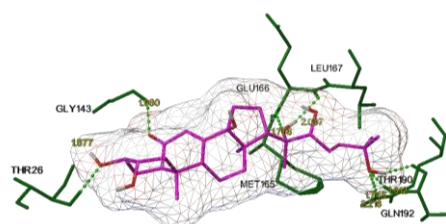

**154573806 – GLR-024-20 (-14.05 kcal/mol)**

H(N<sub>5</sub>) ... Thr26(O),  $d = 1.917 \text{ \AA}$   
 H(N<sub>2</sub>) ... Phe140(O),  $d = 1.983 \text{ \AA}$   
 Gly143(N) ... O<sub>1</sub>,  $d = 1.995 \text{ \AA}$   
 His163(NE<sub>2</sub>) ... O<sub>2</sub>,  $d = 1.996 \text{ \AA}$   
 H(O<sub>3</sub>) ... His164(O),  $d = 2.247 \text{ \AA}$   
 Glu166(N) ... N<sub>3</sub>,  $d = 1.824 \text{ \AA}$

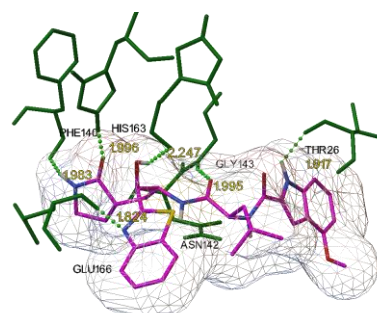

**Table S2B.** CID, trivial name, docking score (in brackets), putative binding sites and description of predicted H-bonds of five best scoring compounds against 6LU7 structure of 3CL<sup>pro</sup>[5]. Docked compounds are in purple colour and the protein is in orange.

|                                                                                                                                                                                                                                                                                                                                                                                                                          |                                                                                      |
|--------------------------------------------------------------------------------------------------------------------------------------------------------------------------------------------------------------------------------------------------------------------------------------------------------------------------------------------------------------------------------------------------------------------------|--------------------------------------------------------------------------------------|
| <p style="text-align: center;"><b>3191 – Ebastine (-14.11 kcal/mol)</b></p> <p>His163(NE<sub>2</sub>) ... O<sub>1</sub>, <math>d = 1.717 \text{ \AA}</math><br/>           Glu166(N) ... O<sub>2</sub>, <math>d = 2.221 \text{ \AA}</math></p>                                                                                                                                                                           | 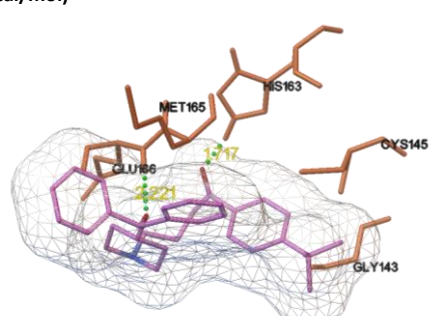   |
| <p style="text-align: center;"><b>53472683 – Vazegepant (-13.80 kcal/mol)</b></p> <p>Thr26(N) ... N<sub>8</sub>, <math>d = 2.210 \text{ \AA}</math></p>                                                                                                                                                                                                                                                                  |    |
| <p style="text-align: center;"><b>154573806 – GRL-024-20 (-13.58 kcal/mol)</b></p> <p>H(N<sub>2</sub>) ... Thr26(O), <math>d = 2.095 \text{ \AA}</math><br/>           Gly143(N) ... O<sub>2</sub>, <math>d = 1.962 \text{ \AA}</math><br/>           H(O<sub>3</sub>) ... Gln189(OE<sub>1</sub>), <math>d = 1.955 \text{ \AA}</math></p>                                                                                |  |
| <p style="text-align: center;"><b>5281040 – Montelukast (-12.83 kcal/mol)</b></p> <p>Asn142(N) ... O<sub>2</sub>, <math>d = 1.684 \text{ \AA}</math><br/>           Glu166 ... O<sub>3</sub>, <math>d = 2.046 \text{ \AA}</math></p>                                                                                                                                                                                     |  |
| <p style="text-align: center;"><b>46700782 – Razuprotafib (-12.83 kcal/mol)</b></p> <p>Thr26(N) ... O<sub>4</sub>, <math>d = 1.822 \text{ \AA}</math><br/>           H(O<sub>4</sub>) ... Thr24(O), <math>d = 1.759 \text{ \AA}</math><br/>           Glu166(N) ... O<sub>3</sub>, <math>d = 1.740 \text{ \AA}</math><br/>           H(N<sub>2</sub>) ... Gln189(OE<sub>1</sub>), <math>d = 2.033 \text{ \AA}</math></p> |  |

**Table S2C.** CID, trivial name, docking score (in brackets), putative binding sites and description of predicted H-bonds of five best scoring compounds against 6WZU structure of PL<sup>pro</sup>[6]. Docked compounds are in purple colour and the protein is in blue.

**16923 – Solumedrol (-10.89 kcal/mol)**

Lys105(NZ) ... O<sub>7</sub>, *d* = 1.721 Å  
 Trp106(N) ... O<sub>5</sub>, *d* = 1.884 Å  
 H(O<sub>2</sub>) ... Asp286(OD<sub>1</sub>), *d* = 2.081 Å  
 Ala288(N) ... O<sub>5</sub>, *d* = 1.852 Å

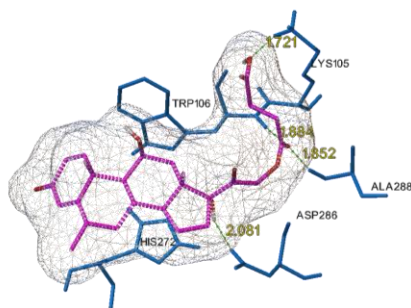

**73425380 – TAK-599 (-10.69 kcal/mol)**

His89(ND<sub>1</sub>) ... O<sub>5</sub>, *d* = 2.062 Å  
 Lys105(NZ) ... O<sub>1</sub>, *d* = 1.831 Å  
 Asp108(N) ... O<sub>3</sub>, *d* = 1.694 Å  
 H(O<sub>4</sub>) ... Asp108(OD<sub>2</sub>), *d* = 1.752 Å  
 H(O<sub>6</sub>) ... Asp108(OD<sub>2</sub>), *d* = 2.014 Å

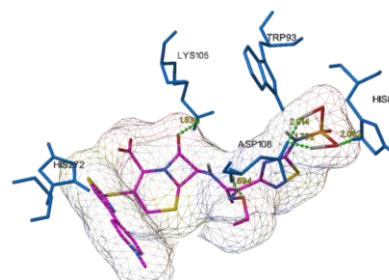

**25245769 – Biliverdin(2-) (-10.67 kcal/mol)**

Lys105(NZ) ... O<sub>3</sub>, *d* = 1.720 Å  
 H(N<sub>2</sub>) ... Trp106(O), *d* = 1.912 Å  
 Asp108(N) ... O<sub>6</sub>, *d* = 2.082 Å  
 Ala288(N) ... O<sub>3</sub>, *d* = 1.662 Å

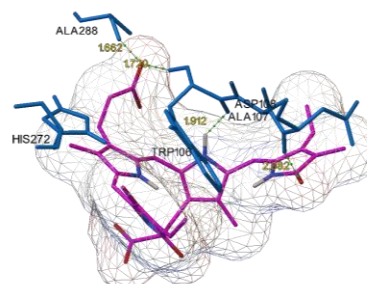

**135483998 – 5-Methyltetrahydrofolate (-10.66 kcal/mol)**

Lys105(NZ) ... O<sub>4</sub>, *d* = 1.985 Å  
 Trp106(N) ... O<sub>5</sub>, *d* = 1.579 Å  
 H(N<sub>5</sub>) ... Asn109(OD<sub>1</sub>), *d* = 2.092 Å  
 H(N<sub>6</sub>) ... Asn109(OD<sub>1</sub>), *d* = 2.130 Å  
 Ala288(N) ... O<sub>5</sub>, *d* = 1.897 Å

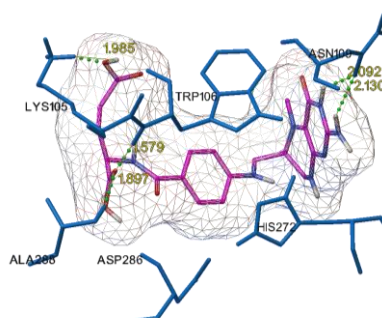

**122146 (-10.61 kcal/mol)**

Trp106(N) ... (O<sub>4</sub>), *d* = 1.768 Å  
 Asn109(ND<sub>2</sub>) ... (O<sub>7</sub>), *d* = 1.808 Å  
 H(O<sub>6</sub>) ... Asn109(OD<sub>1</sub>), *d* = 2.154 Å  
 H(O<sub>8</sub>) ... Gly160(O), *d* = 2.109 Å  
 H(O<sub>5</sub>) ... Asp286(O), *d* = 2.042 Å  
 Ala288(N) ... O<sub>5</sub>, *d* = 2.210 Å

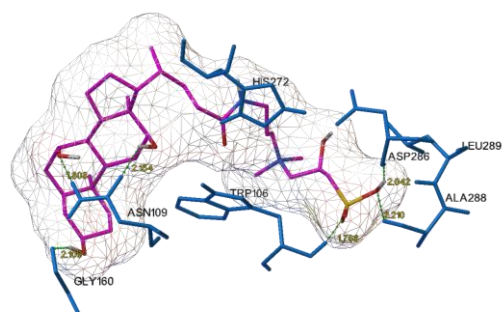

**Table S2D.** CID, trivial name, docking score (in brackets), putative binding sites and description of predicted H-bonds of five best scoring compounds against 7CMD structure of PL<sup>pro</sup> [7]. Docked compounds are in purple colour and the protein is in yellow.

**121893 – Protoporphyrin IX (-11.58 kcal/mol)**

Lys105(NZ) ... O<sub>1</sub>,  $d = 1.972 \text{ \AA}$   
 Trp106(NZ) ... O<sub>2</sub>,  $d = 1.987 \text{ \AA}$

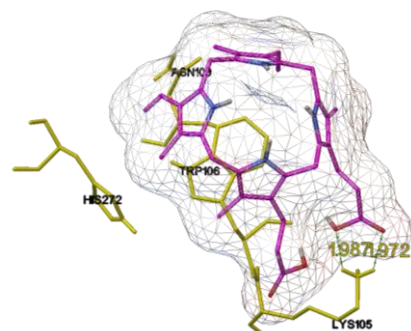

**9548902 – Taurochenode oxycholate(1-) (-11.24 kcal/mol)**

Lys105(NZ) ... O<sub>6</sub>,  $d = 2.179 \text{ \AA}$   
 H(O<sub>6</sub>) ... Trp106(O),  $d = 2.109 \text{ \AA}$   
 Asn267(ND) ... O<sub>2</sub>,  $d = 2.022 \text{ \AA}$   
 Asn267(N) ... O<sub>3</sub>,  $d = 1.855 \text{ \AA}$   
 H(N) ... Cys270(O),  $d = 1.951 \text{ \AA}$

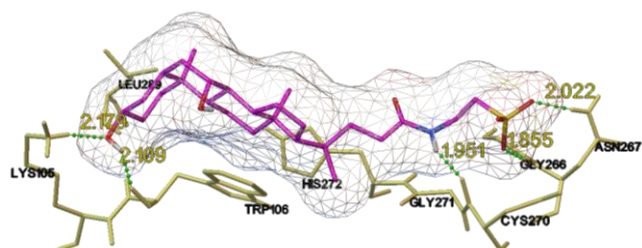

**60947 – Tirofiban (-10.97 kcal/mol)**

H(N<sub>2</sub>) ... Cys270(O),  $d = 2.151 \text{ \AA}$   
 His272(NE<sub>2</sub>) ... O<sub>1</sub>,  $d = 2.166 \text{ \AA}$   
 H(N<sub>1</sub>) ... Asp286(O),  $d = 2.180 \text{ \AA}$   
 Ala288(N) ... O<sub>3</sub>,  $d = 2.160 \text{ \AA}$

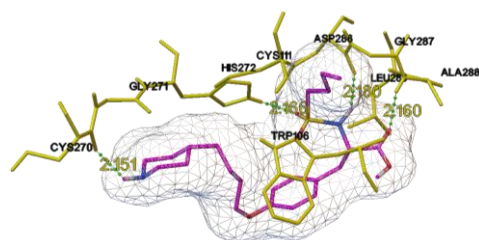

**5362119 – Lisinopril (-10.90 kcal/mol)**

Lys105(NZ) ... O<sub>4</sub>,  $d = 2.135 \text{ \AA}$   
 H(N<sub>3</sub>) ... Tyr273(O),  $d = 2.002 \text{ \AA}$   
 H(N<sub>3</sub>) ... Asp286 (OD<sub>1</sub>),  $d = 1.689 \text{ \AA}$

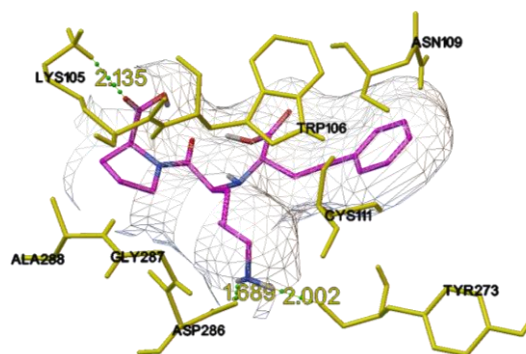

**72734520 – Avitinib (-10.77 kcal/mol)**

H(N<sub>7</sub>) ... Asp286(OD<sub>1</sub>),  $d = 2.053 \text{ \AA}$

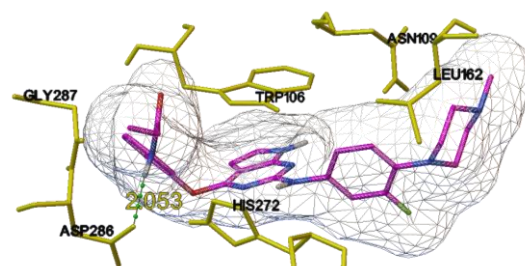

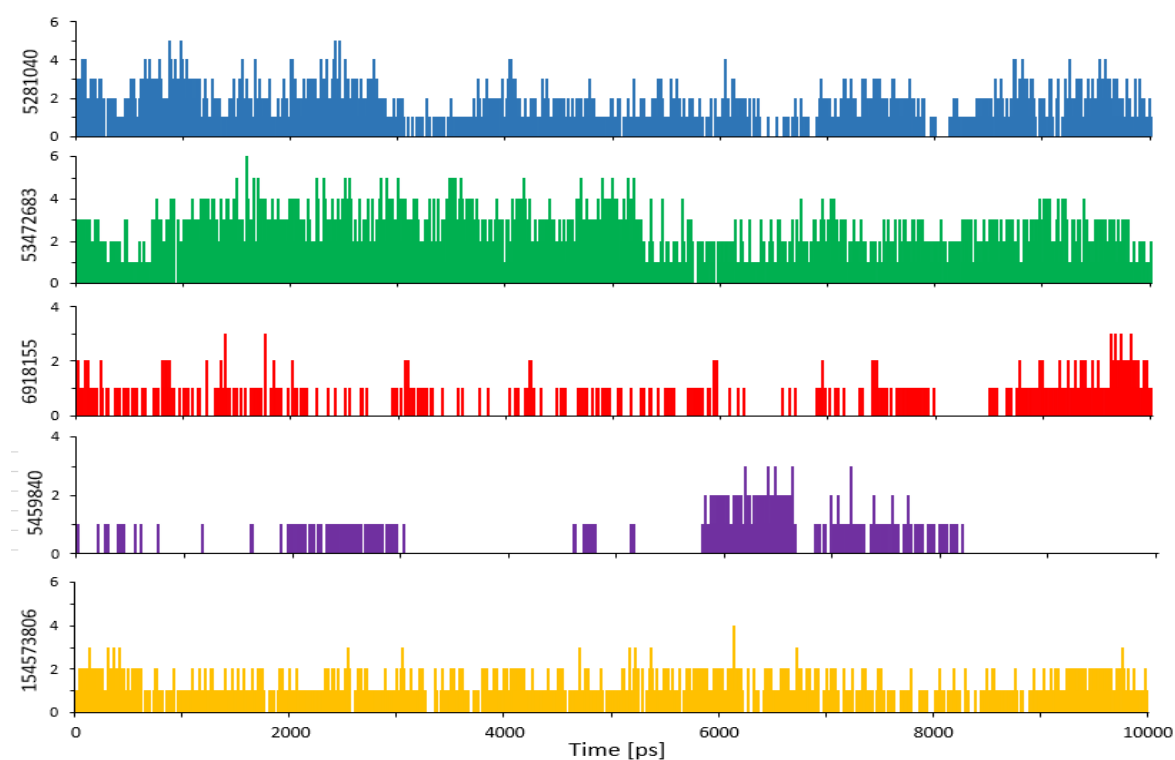

**Figure S1A.** Time plot evolution of H-bonds formed between 6WQF 3CL<sup>pro</sup> structure and Montelukast (CID: 5281040) represented by blue colour, Vazegepant/zevagepant (CID: 53472683) represented by green colour, Ciclesonide (CID: 6918155) represented by red colour, 20-hydroxyecdysone (CID: 5459840) represented by violet colour and GRL-024-20 (CID: 154573806) represented by yellow colour.

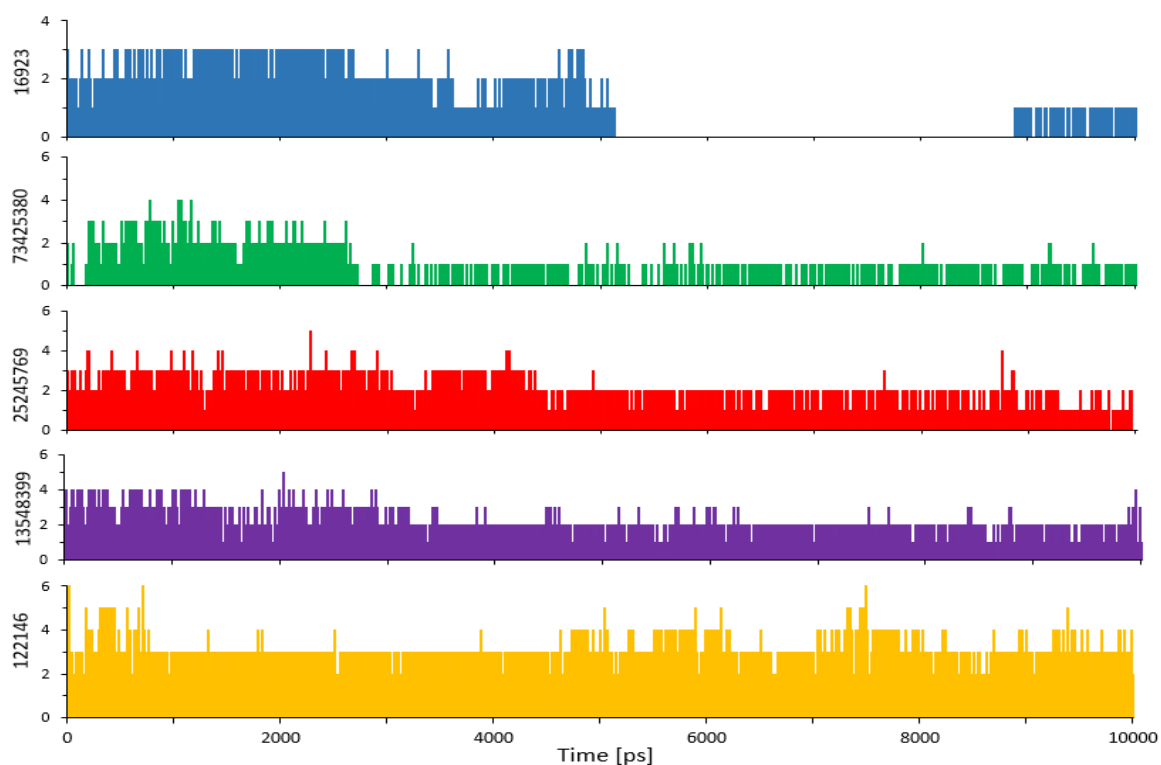

**Figure S1B.** Time plot evolution of H-bonds formed between 6WZU PL<sup>pro</sup> structure and Solumedrol (CID: 16923) represented by blue colour, TAK-599 (CID: 73425380) represented by green colour, Biliverdine(2-) (CID: 25245769) represented by red colour, 5-Methyltetrahydrofolate (CID: 135483998) represented by violet and compound CID: 122146 represented by yellow colour.



**Table S3A.** H-bonds identifications and their occupancy over the MD simulation of 5281040 (Montelukast)-6WQF complex with 1 % time cut-off.

| <b>Donor atom</b>           | <b>Acceptor atom</b> | <b>Occupancy</b> |
|-----------------------------|----------------------|------------------|
| Lig-O <sub>3</sub>          | Thr190-Main-O        | 42.12%           |
| Lig-O <sub>2</sub>          | Ser144-Side-OG       | 32.04%           |
| Glu166-Main-N               | Lig-S                | 20.16%           |
| His163-Side-NE <sub>2</sub> | Lig-O <sub>1</sub>   | 12.28%           |
| Gln192-Main-N               | Lig-O <sub>3</sub>   | 9.98%            |
| His163-Side-NE <sub>2</sub> | Lig-O <sub>2</sub>   | 7.68%            |
| Ser144-Main-N               | Lig-O <sub>1</sub>   | 6.69%            |
| Lig-O <sub>2</sub>          | His164-Main-O        | 5.39%            |
| Glu166-Main-N               | Lig-O <sub>1</sub>   | 3.59%            |
| Glu143-Main-N               | Lig-O <sub>1</sub>   | 1.50%            |
| Glu166-Main-N               | Lig-O <sub>2</sub>   | 1.00%            |

**Table S3B.** H-bonds identifications and their occupancy over the MD simulation of 53472683 (Vazegepant)-6WQF complex with 1 % time cut-off.

| <b>Donor atom</b>           | <b>Acceptor atom</b>        | <b>Occupancy</b> |
|-----------------------------|-----------------------------|------------------|
| Thr26-Main-N                | Lig-O <sub>2</sub>          | 72.95%           |
| Lig-N <sub>3</sub>          | Thr24-Main-O                | 33.13%           |
| Gly143-Main-N               | Lig-O <sub>1</sub>          | 30.84%           |
| Gln189-Side-NE <sub>2</sub> | Lig-N <sub>8</sub>          | 29.64%           |
| Cys145-Main-N               | Lig-O <sub>1</sub>          | 22.65%           |
| Asn142-Side-ND <sub>2</sub> | Lig-O <sub>1</sub>          | 10.28%           |
| Ser144-Main-N               | Lig-O <sub>1</sub>          | 6.29%            |
| Lig-N <sub>7</sub>          | Gln189-Side-OE <sub>1</sub> | 4.79%            |
| Asn142-Side-ND <sub>2</sub> | Lig-O <sub>3</sub>          | 2.69%            |
| Gln189-Side-NE <sub>2</sub> | Lig-N <sub>7</sub>          | 2.30%            |
| Thr25-Side-OG <sub>1</sub>  | Lig-O <sub>2</sub>          | 1.20%            |
| Cys145-Side-SG              | Lig-N <sub>2</sub>          | 1.10%            |

**Table S3C.** H-bonds identifications and their occupancy over the MD simulation of 6918155 (Ciclesonide)-6WQF complex with 1 % time cut-off.

| <b>Donor atom</b>           | <b>Acceptor atom</b> | <b>Occupancy</b> |
|-----------------------------|----------------------|------------------|
| Arg4-Side-NH <sub>2</sub>   | Lig-O <sub>2</sub>   | 9.68%            |
| Lys5-Side-NZ                | Lig-O <sub>4</sub>   | 6.39%            |
| Arg4-Side-NE                | Lig-O <sub>4</sub>   | 3.29%            |
| Ala285-Main-N               | Lig-O <sub>7</sub>   | 3.09%            |
| Arg4-Side-NH <sub>2</sub>   | Lig-O <sub>4</sub>   | 2.79%            |
| Arg4-Side-NH <sub>2</sub>   | Lig-O <sub>7</sub>   | 1.30%            |
| Lig-O <sub>7</sub>          | Val125-Main-O        | 1.20%            |
| Arg4-Side-NE                | Lig-O <sub>2</sub>   | 1.20%            |
| Thr280-Side-OG <sub>1</sub> | Lig-O <sub>5</sub>   | 1.10%            |

**Table S3D.** H-bonds identifications and their occupancy over the MD simulation of 5459840 (20-hydroxyecdysone)-6WQF complex with 1 % time cut-off.

| <b>Donor atom</b>           | <b>Acceptor atom</b>        | <b>Occupancy</b> |
|-----------------------------|-----------------------------|------------------|
| Thr26-Main-N                | Lig-O <sub>3</sub>          | 10.68%           |
| Ser46-Side-OG               | Lig-O <sub>7</sub>          | 9.38%            |
| Gln189-Side-NE <sub>2</sub> | Lig-O <sub>4</sub>          | 7.98%            |
| Glu166-Main-N               | Lig-O <sub>2</sub>          | 3.99%            |
| Lig-O <sub>7</sub>          | Gln189-Side-OE <sub>1</sub> | 3.59%            |
| Thr190-Main-N               | Lig-O <sub>6</sub>          | 1.80%            |
| Gln189-Side-NE <sub>2</sub> | Lig-O <sub>6</sub>          | 1.70%            |
| Lig-O <sub>7</sub>          | Ser46-Side-OG               | 1.20%            |

**Table S3E.** H-bonds identifications and their occupancy over the MD simulation of 154573806 (GRL-024-20)-6WQF complex with 1 % time cut-off.

| <b>Donor atom</b>           | <b>Acceptor atom</b>        | <b>Occupancy</b> |
|-----------------------------|-----------------------------|------------------|
| Asn142-Side-ND <sub>2</sub> | Lig-O <sub>1</sub>          | 24.55%           |
| Lig-N <sub>2</sub>          | Asn142-Side-OD <sub>1</sub> | 19.46%           |
| Glu166-Main-N               | Lig-O <sub>3</sub>          | 17.76%           |
| Glu166-Main-N               | Lig-S                       | 15.37%           |
| Gly143-Main-N               | Lig-O <sub>1</sub>          | 6.49%            |
| Lig-N <sub>4</sub>          | Ser46-Side-OG               | 3.79%            |
| His41-Side-NE <sub>2</sub>  | Lig-O <sub>4</sub>          | 2.89%            |
| Gly143-Main-N               | Lig-O <sub>4</sub>          | 1.60%            |
| Gly143-Main-N               | Lig-O <sub>2</sub>          | 1.10%            |

**Table S4A.** H-bonds identifications and their occupancy over the MD simulation of 16923 (Solumedrol)-6WZU complex with 1 % time cut-off.

| <b>Donor atom</b>           | <b>Acceptor atom</b>        | <b>Occupancy</b> |
|-----------------------------|-----------------------------|------------------|
| Lig-O <sub>5</sub>          | Asp286-Side-OD <sub>1</sub> | 87.24%           |
| Lig-O <sub>2</sub>          | Asp286-Side-OD <sub>2</sub> | 85.95%           |
| Trp106-Main-N               | Lig-O <sub>4</sub>          | 75.98%           |
| Ala288-Main-N               | Lig-O <sub>3</sub>          | 12.97%           |
| Lig-O <sub>2</sub>          | Asp286-Side-OD <sub>1</sub> | 5.38%            |
| Lig-O <sub>8</sub>          | Asn109-Side-OD <sub>1</sub> | 3.79%            |
| Lys274-Side-NZ              | Lig-O <sub>1</sub>          | 2.90%            |
| Asn267-Side-ND <sub>2</sub> | Lig-O <sub>6</sub>          | 2.70%            |
| Lig-O <sub>6</sub>          | Asn267-Side-OD <sub>1</sub> | 1.89%            |
| Lig-O <sub>8</sub>          | Asn267-Side-OD <sub>1</sub> | 1.60%            |
| Lig-O <sub>6</sub>          | Asn267-Main-O               | 1.10%            |
| Trp106-Main-N               | Lig-O <sub>5</sub>          | 1.10%            |

Table S4B. H-bonds identifications and their occupancy over the MD simulation of 73425680 (TAK-599)-6WZU complex with 1 % time cut-off.

| Donor atom         | Acceptor atom               | Occupancy |
|--------------------|-----------------------------|-----------|
| Lig-O <sub>6</sub> | Asp286-Main-O               | 88.72%    |
| Ala288-Main-N      | Lig-O <sub>5</sub>          | 81.23%    |
| Lig-N <sub>6</sub> | Gly271-Main-O               | 12.65%    |
| Lig-N <sub>6</sub> | Asn109-Side-OD <sub>1</sub> | 7.97%     |
| Lig-N <sub>5</sub> | Asn109-Side-OD <sub>1</sub> | 2.99%     |
| Lig-N <sub>3</sub> | Cys270-Main-O               | 2.79%     |
| LYS105-Side-NZ     | Lig-O <sub>3</sub>          | 1.60%     |
| Lig-N <sub>6</sub> | Gln269-Main-O               | 1.60%     |

Table S4C. H-bonds identifications and their occupancy over the MD simulation of 25245769 (Biliverdine(2-))-6WZU complex with 1 % time cut-off.

| Donor atom         | Acceptor atom      | Occupancy |
|--------------------|--------------------|-----------|
| Ala288-Main-N      | Lig-O <sub>3</sub> | 58.62%    |
| Trp106-Main-N      | Lig-O <sub>2</sub> | 45.07%    |
| Lig-N <sub>1</sub> | Trp106-Main-O      | 35.06%    |
| Trp106-Main-N      | Lig-O <sub>3</sub> | 26.02%    |
| Ala288-Main-N      | Lig-O <sub>2</sub> | 10.37%    |
| Asp108-Main-N      | Lig-O <sub>6</sub> | 4.58%     |
| Lys105-Side-NZ     | Lig-O <sub>3</sub> | 1.70%     |

Table S4D. H-bonds identifications and their occupancy over the MD simulation of 135483998 (5-methyltetrahydrofolate)-6WZU complex with 1 % time cut-off.

| Donor atom         | Acceptor atom               | Occupancy |
|--------------------|-----------------------------|-----------|
| Ala288-Main-N      | Lig-O <sub>5</sub>          | 42.83%    |
| Lig-O <sub>2</sub> | Asp286-Side-OD <sub>1</sub> | 29.68%    |
| Trp106-Main-N      | Lig-O <sub>6</sub>          | 10.66%    |
| Glu252-Main-N      | Lig-O <sub>1</sub>          | 7.19%     |
| Trp106-Main-N      | Lig-O <sub>2</sub>          | 6.58%     |
| Trp106-Main-N      | Lig-O <sub>5</sub>          | 5.08%     |
| Lig-O <sub>2</sub> | Asp286-Side-OD <sub>2</sub> | 3.79%     |
| Lys105-Side-NZ     | Lig-O <sub>6</sub>          | 1.80%     |

**Table S4E.** H-bonds identifications and their occupancy over the MD simulation of 122146-6WZU complex with 1 % time cut-off.

| <b>Donor atom</b>  | <b>Acceptor atom</b>        | <b>Occupancy</b> |
|--------------------|-----------------------------|------------------|
| Lys94-Side-NZ      | Lig-O <sub>5</sub>          | 27.44%           |
| Lig-O <sub>4</sub> | Asp108-Side-OD <sub>2</sub> | 20.82%           |
| Lig-O <sub>6</sub> | Asp108-Side-OD <sub>1</sub> | 14.15%           |
| Lig-O <sub>4</sub> | Lys92-Main-O                | 7.68%            |
| Asp108-Main-N      | Lig-O <sub>3</sub>          | 3.69%            |
| Lig-N <sub>6</sub> | Asp108-Side-OD <sub>1</sub> | 3.59%            |
| Lys105-Side-NZ     | Lig-O <sub>1</sub>          | 1.99%            |
| Lys105-Side-NZ     | Lig-O <sub>2</sub>          | 1.20%            |
| Lig-O <sub>6</sub> | Lys92-Main-O                | 1.20%            |
| Lig-O <sub>6</sub> | Asp108-Side-OD <sub>2</sub> | 1.20%            |
| Lig-O <sub>4</sub> | Asp108-Side-OD <sub>1</sub> | 1.10%            |

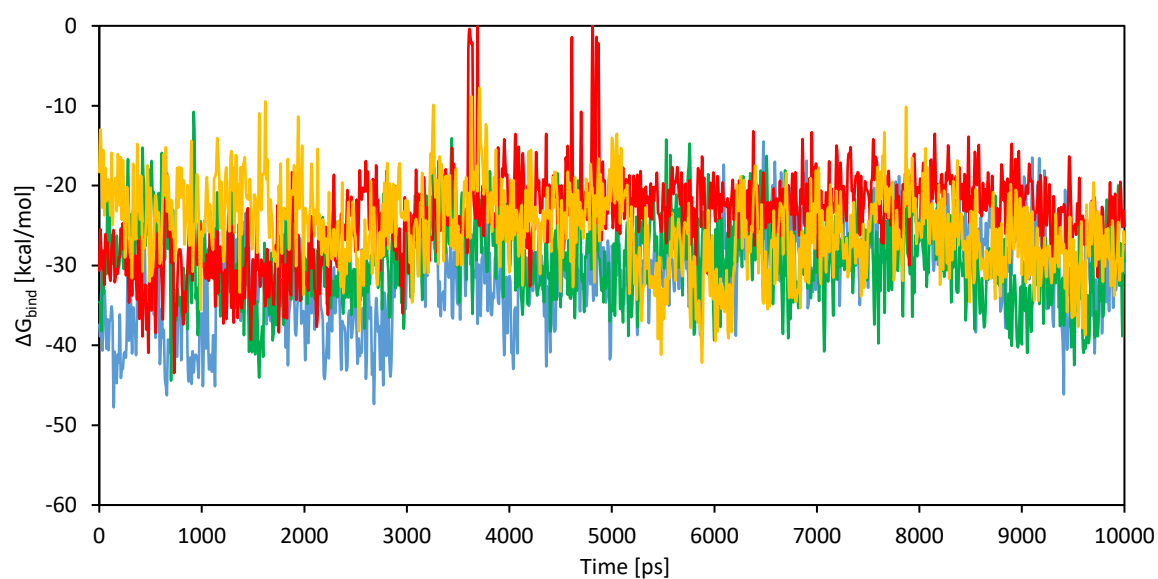

**Figure S2A.** Time plot evolution of binding free energies values calculated using MM-PBSA approach (Molecular Mechanics – Poisson-Boltzmann Surface Area)[8,9] of complexes with 6WQF 3CL<sup>pro</sup> structure. Montelukast (CID: 5281040) represented by blue colour, Vazegepant/zevagepant (CID: 53472683) represented by green colour, Ciclesonide (CID: 6918155) represented by red colour and GRL-024-20 (CID: 154573806) represented by yellow colour.

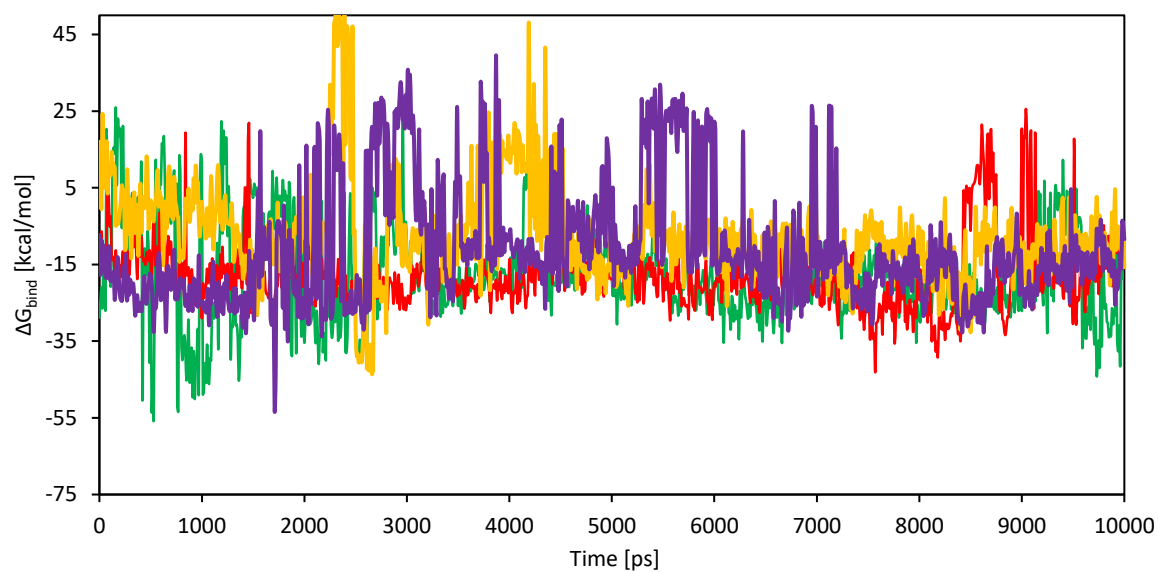

**Figure S2B.** Time plot evolution of binding free energies values calculated using MM-PBSA approach[8,9] of complexes with 6WZU PL<sup>pro</sup> structure. TAK-599 (CID: 73425380) represented by green colour, Biliverdine(2-) (CID: 25245769) represented by red colour, 5-methyltetrahydrofolate (CID: 135483998) represented by violet and compound CID: 122146 represented by yellow colour.

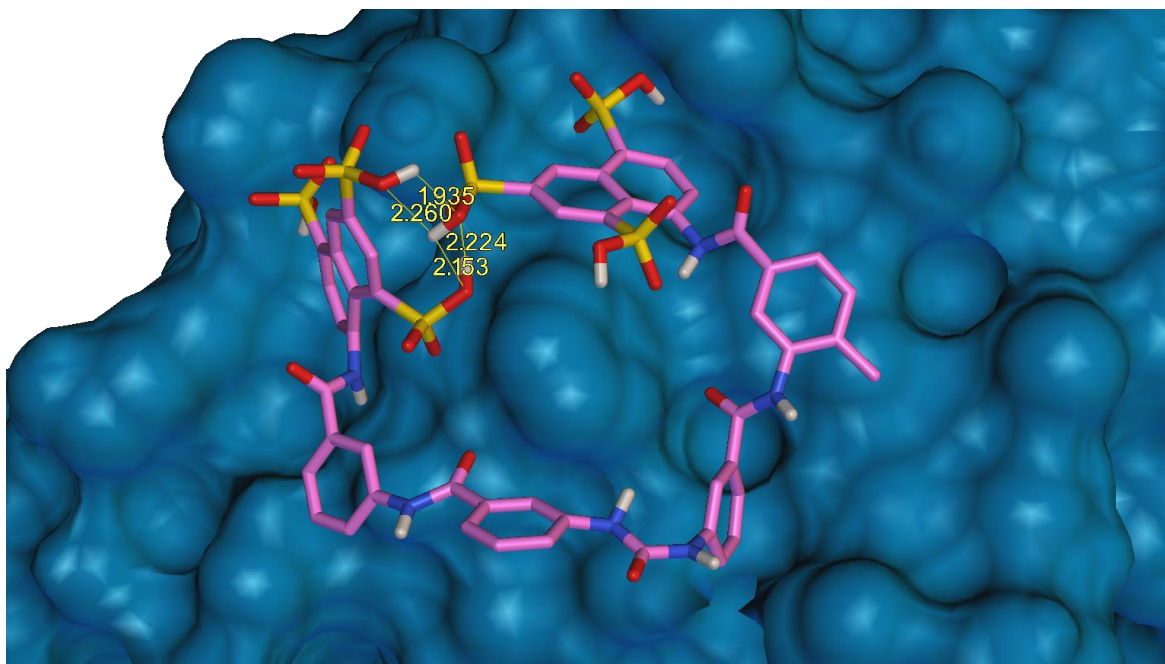

**Figure S3.** Docking pose of Suramine (CID: 5361) in the 6WZU PL<sup>D</sup> structure. Cyclisation of the compound is illustrated by the intramolecular distances of atoms that are suspected to participate in H-bonds formation.

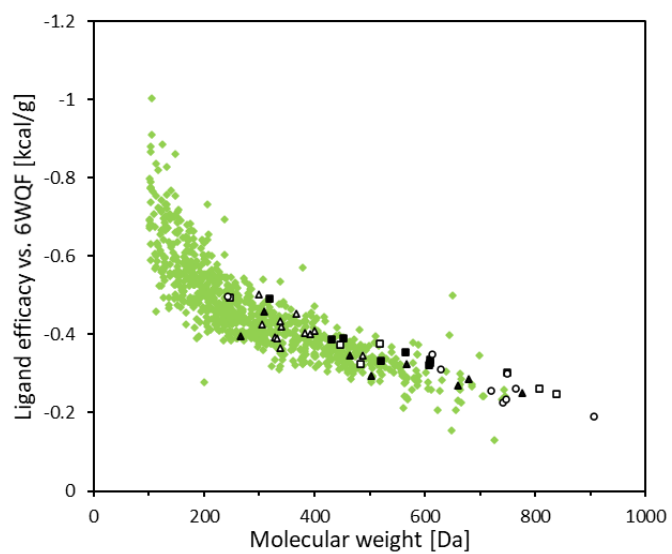

**A**

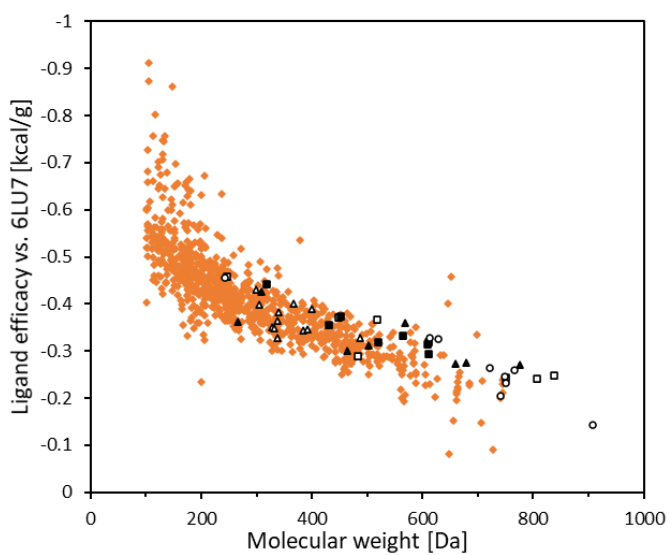

**B**

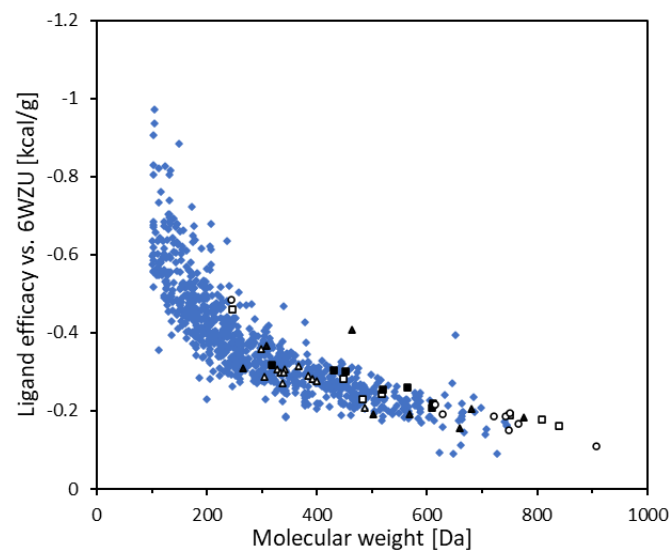

**C**

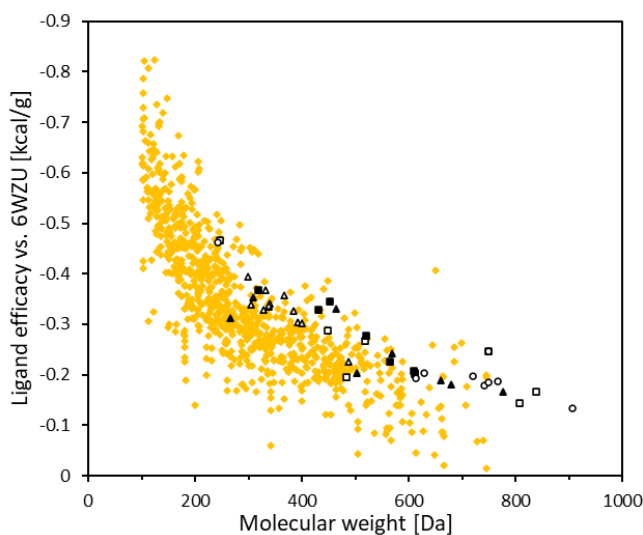

#### D

**Figure S4.** Ligand efficacies of initially selected compounds (colored diamonds), redocked compounds from selected publications (empty triangles) [10], (full triangles) [11], (empty squares) [12], (full squares) [13] and (empty circles) [14] against 6WQF (A), 6LU7 (B), 6WZU (C) and 7CMD (D) with respect to their molecular weight. Compounds with molecular weight exceeding 1000 Da, one from Wu *et al.* [11] (CID: 5361) and one from Shah *et al.* [14] (CID: 123794), are excluded from these representations.

## References

- [1] 2D structure image of CID 122146, (n.d.). <https://pubchem.ncbi.nlm.nih.gov/compound/122146#section=2D-Structure> (accessed December 1, 2020).
- [2] S. Kim, J. Chen, T. Cheng, A. Gindulyte, J. He, S. He, Q. Li, B.A. Shoemaker, P.A. Thiessen, B. Yu, L. Zaslavsky, J. Zhang, E.E. Bolton, PubChem 2019 update: improved access to chemical data, *Nucleic Acids Res.* 47 (2018) D1102–D1109. <https://doi.org/10.1093/nar/gky1033>.
- [3] S. Kim, J. Chen, T. Cheng, A. Gindulyte, J. He, S. He, Q. Li, B.A. Shoemaker, P.A. Thiessen, B. Yu, L. Zaslavsky, J. Zhang, E.E. Bolton, PubChem in 2021: new data content and improved web interfaces, *Nucleic Acids Res.* 49 (2021) D1388–D1395. <https://doi.org/10.1093/nar/gkaa971>.
- [4] D.W. Kneller, G. Phillips, H.M. O'Neill, R. Jedrzejczak, L. Stols, P. Langan, A. Joachimiak, L. Coates, A. Kovalevsky, Structural plasticity of SARS-CoV-2 3CL Mpro active site cavity revealed by room temperature X-ray crystallography, *Nat. Commun.* 11 (2020) 3202. <https://doi.org/10.1038/s41467-020-16954-7>.
- [5] Z. Jin, X. Du, Y. Xu, Y. Deng, M. Liu, Y. Zhao, B. Zhang, X. Li, L. Zhang, C. Peng, Y. Duan, J. Yu, L. Wang, K. Yang, F. Liu, R. Jiang, X. Yang, T. You, X. Liu, X. Yang, F. Bai, H. Liu, X. Liu, L.W. Guddat, W. Xu, G. Xiao, C. Qin, Z. Shi, H. Jiang, Z. Rao, H. Yang, Structure of Mpro from SARS-CoV-2 and discovery of its inhibitors, *Nature*. 582 (2020) 289–293. <https://doi.org/10.1038/s41586-020-2223-y>.
- [6] J. Osipiuk, S.-A. Azizi, S. Dvorkin, M. Endres, R. Jedrzejczak, K.A. Jones, S. Kang, R.S. Kathayat, Y. Kim, V.G. Lisnyak, S.L. Maki, V. Nicolaescu, C.A. Taylor, C. Tesar, Y.-A. Zhang, Z. Zhou, G. Randall, K. Michalska, S.A. Snyder, B.C. Dickinson, A. Joachimiak, Structure of papain-like protease from SARS-CoV-2 and its complexes with non-covalent inhibitors, *BioRxiv.* (2020) 2020.08.06.240192. <https://doi.org/10.1101/2020.08.06.240192>.
- [7] X. Gao, B. Qin, P. Chen, K. Zhu, P. Hou, J.A. Wojdyla, M. Wang, S. Cui, Crystal structure of SARS-CoV-2 papain-like protease, *Acta Pharm. Sin. B.* 11 (2021) 237–245. <https://doi.org/https://doi.org/10.1016/j.apsb.2020.08.014>.
- [8] R. Kumari, R. Kumar, A. Lynn, g\_mmpbsa—A GROMACS Tool for High-Throughput MM-PBSA Calculations, *J. Chem. Inf. Model.* 54 (2014) 1951–1962. <https://doi.org/10.1021/ci500020m>.
- [9] N.A. Baker, D. Sept, S. Joseph, M.J. Holst, J.A. McCammon, Electrostatics of nanosystems: Application to microtubules and the ribosome, *Proc. Natl. Acad. Sci.* 98 (2001) 10037–10041. <https://doi.org/10.1073/pnas.181342398>.
- [10] A. Fischer, M. Sellner, S. Neranjan, M.A. Lill, M. Smieško, Inhibitors for Novel Coronavirus Protease Identified by Virtual Screening of 687 Million Compounds, (2020). <https://doi.org/10.26434/chemrxiv.11923239.v1>.
- [11] C. Wu, Y. Liu, Y. Yang, P. Zhang, W. Zhong, Y. Wang, Q. Wang, Y. Xu, M. Li, X. Li, M. Zheng, L. Chen, H. Li, Analysis of therapeutic targets for SARS-CoV-2 and discovery of potential drugs by computational methods, *Acta Pharm. Sin. B.* 10 (2020) 766–788. <https://doi.org/https://doi.org/10.1016/j.apsb.2020.02.008>.
- [12] F.S. Hosseini, M. Amanlou, Anti-HCV and anti-malaria agent, potential candidates to repurpose for coronavirus infection: Virtual screening, molecular docking, and molecular dynamics simulation study, *Life Sci.* 258 (2020) 118205. <https://doi.org/https://doi.org/10.1016/j.lfs.2020.118205>.
- [13] S. Adem, V. Eyupoglu, I. Sarfraz, A. Rasul, M. Ali, Identification of Potent COVID-19 Main Protease (Mpro) Inhibitors from Natural Polyphenols: An in Silico Strategy Unveils a Hope against CORONA, (2020). <https://doi.org/10.20944/PREPRINTS202003.0333.V1>.
- [14] B. Shah, P. Modi, S.R. Sagar, In silico studies on therapeutic agents for COVID-19: Drug repurposing approach., *Life Sci.* 252 (2020) 117652. <https://doi.org/10.1016/j.lfs.2020.117652>.
